# Supplementary material
Source: PubMed Central journal article supplement (PMC6885624)
Supplement: supp_RA119.011067_155828_1_supp_416471_pztwrx.pdf [file supp_RA119.011067_155828_1_supp_416471_pztwrx.pdf]

## SUPPORTING INFORMATION

A

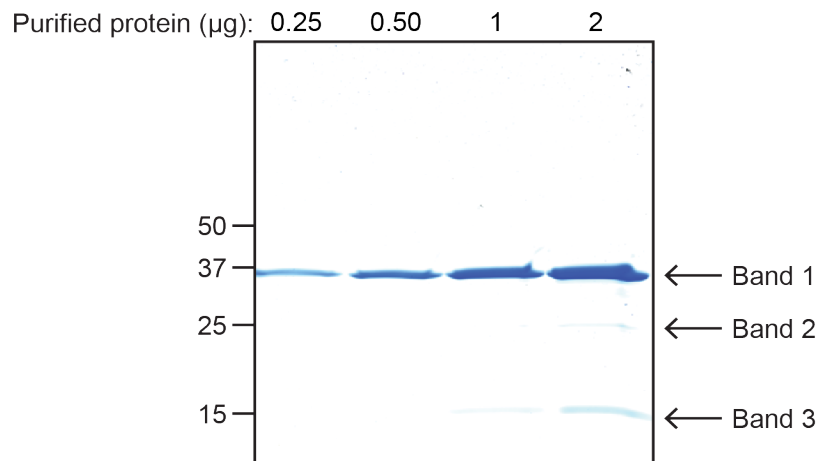

**Figure S1.** Assessment of the purity of AKR1A1. Coomassie-stained SDS-PAGE gel illustrating serial dilution of the purified protein. The identity of the highlighted bands is shown in Table S1.

**Table S1. Results of protein identification from three bands in Fig. S1**

| <b>Protein name</b>                                               | <b>Database accession ID</b> | <b>Molecular weight (Da)</b> |
|-------------------------------------------------------------------|------------------------------|------------------------------|
| AKR1A1 protein.- Bos taurus (Bovine)<br>Band 1; major band        | Q3ZCJ2_BOVIN                 | 36594                        |
| AKR1A1 protein.- Bos taurus (Bovine)<br>Band 2                    | Q3ZCJ2_BOVIN                 | 36594                        |
| hemoglobin beta chain [validated] – Bos Taurus (Bovine)<br>Band 3 | HBBOB                        | 15944.3                      |

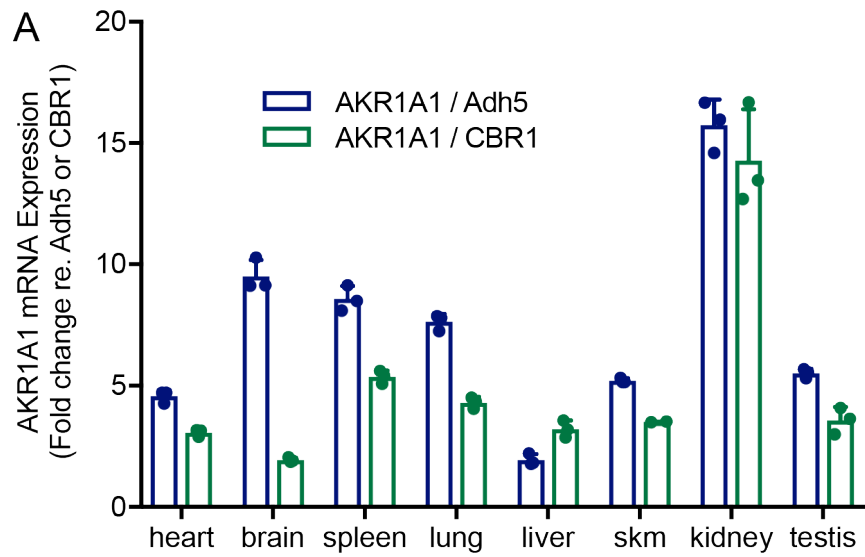

**Figure S2.** Fold difference in basal *AKR1A1* mRNA expression compared relative to *ADH5* or *CBR1*. qRT-PCR analysis was performed using indicated mouse tissues and expression of *AKR1A1*, *CBR1*, and *ADH5* was analyzed with normalization to expression of 18S rRNA. Data are represented as a ratio of normalized expression.



**Figure S3.** Product analysis of GSNO reduction by AKR1A1. (A and B) Electron-spray ionization mass spectra of the reactants (A) and products (B) of assay of AKR1A1 purified from bovine kidney (for clarity, the range of  $m/z$  spectra shown is from 300 to 500). In A and B, clusters of peaks at 22 atomic mass unit intervals represent sodiated species. In B, peaks at  $m/z$  339 and 361 correspond to glutathione-sulfinamide and its  $\text{Na}^+$  adduct, respectively. Inset shows the MS/MS spectra of the peak at  $m/z$  339. Presence of a peak at  $m/z$  322 indicates a loss of  $\text{NH}_3^+$ , confirming glutathione-sulfinamide as the major product. (C) Enzymatic reaction carried out by AKR1A1.

**Table S2****Table S2. Enzyme Kinetics for SCoR and mutants.**

| Substrate   | Enzyme | $K_m^a$<br>( $\mu\text{M}$ ) | $k_{cat}^a$<br>( $\text{min}^{-1}$ ) |
|-------------|--------|------------------------------|--------------------------------------|
| <b>GSNO</b> | WT     | $184 \pm 8$                  | 959                                  |
|             | W22A   | $169 \pm 19$                 | 493                                  |
|             | K23A   | $122 \pm 28$                 | 1161                                 |
|             | K127A  | $336 \pm 24$                 | 953                                  |
|             | W220A  | $143 \pm 17$                 | 824                                  |
|             | R312   | $943 \pm 104$                | 383                                  |

<sup>a</sup> $K_m$  and  $V_{max}$  were determined from Michaelis-Menten curves using GraphPad Prism 7.  $k_{cat}$  was calculated by dividing  $V_{max}$  by the enzyme concentration in each assay. Enzyme assays were performed in triplicate.
